# Supplementary material for: The use of a dietary quality score as a predictor of childhood overweight and obesity
Source: PubMed Central journal article supplement (PMC4477494; doi:10.1186/s12889-015-1907-y), 2015-06-24
Supplement: 12889_2015_1907_MOESM1_ESM.pdf [file 12889_2015_1907_MOESM1_ESM.pdf]

**Additional File 1 (a): Dietary Assessment tools Growing up in Ireland Mother or Lone Father questionnaire**

**D. CHILD'S DIET AND EXERCISE**

D1. [Show Card D1] Looking at Card D1, in the last 24 hours has the Study Child had the following foods and drinks once, more than once, or not at all?

|                                                               | Once                       | More than<br>Once          | Not<br>At All              | Don't<br>know              |
|---------------------------------------------------------------|----------------------------|----------------------------|----------------------------|----------------------------|
| A. Fresh fruit .....                                          | <input type="checkbox"/> 1 | <input type="checkbox"/> 2 | <input type="checkbox"/> 3 | <input type="checkbox"/> 4 |
| B. Fruit juice .....                                          | <input type="checkbox"/> 1 | <input type="checkbox"/> 2 | <input type="checkbox"/> 3 | <input type="checkbox"/> 4 |
| C. Meat / Chicken / Fish.....                                 | <input type="checkbox"/> 1 | <input type="checkbox"/> 2 | <input type="checkbox"/> 3 | <input type="checkbox"/> 4 |
| D. Eggs .....                                                 | <input type="checkbox"/> 1 | <input type="checkbox"/> 2 | <input type="checkbox"/> 3 | <input type="checkbox"/> 4 |
| E. Cooked vegetables.....                                     | <input type="checkbox"/> 1 | <input type="checkbox"/> 2 | <input type="checkbox"/> 3 | <input type="checkbox"/> 4 |
| F. Raw vegetables or salad .....                              | <input type="checkbox"/> 1 | <input type="checkbox"/> 2 | <input type="checkbox"/> 3 | <input type="checkbox"/> 4 |
| G. Meat pie, hamburger, hot dog, sausage or sausage roll..... | <input type="checkbox"/> 1 | <input type="checkbox"/> 2 | <input type="checkbox"/> 3 | <input type="checkbox"/> 4 |
| H. Hot chips or French fries .....                            | <input type="checkbox"/> 1 | <input type="checkbox"/> 2 | <input type="checkbox"/> 3 | <input type="checkbox"/> 4 |
| I. Crisps or savoury snacks .....                             | <input type="checkbox"/> 1 | <input type="checkbox"/> 2 | <input type="checkbox"/> 3 | <input type="checkbox"/> 4 |
| J. Bread .....                                                | <input type="checkbox"/> 1 | <input type="checkbox"/> 2 | <input type="checkbox"/> 3 | <input type="checkbox"/> 4 |
| K. Potatoes/ Pasta/ Rice .....                                | <input type="checkbox"/> 1 | <input type="checkbox"/> 2 | <input type="checkbox"/> 3 | <input type="checkbox"/> 4 |
| L. Cereals .....                                              | <input type="checkbox"/> 1 | <input type="checkbox"/> 2 | <input type="checkbox"/> 3 | <input type="checkbox"/> 4 |
| M. Biscuits, doughnuts, cake, pie or chocolate .....          | <input type="checkbox"/> 1 | <input type="checkbox"/> 2 | <input type="checkbox"/> 3 | <input type="checkbox"/> 4 |
| N. Cheese/yoghurt/ fromage frais .....                        | <input type="checkbox"/> 1 | <input type="checkbox"/> 2 | <input type="checkbox"/> 3 | <input type="checkbox"/> 4 |
| O. Low fat Cheese/ low fat yoghurt.....                       | <input type="checkbox"/> 1 | <input type="checkbox"/> 2 | <input type="checkbox"/> 3 | <input type="checkbox"/> 4 |
| P. Water (tap water / still water/ sparkling water) .....     | <input type="checkbox"/> 1 | <input type="checkbox"/> 2 | <input type="checkbox"/> 3 | <input type="checkbox"/> 4 |
| Q. Soft drinks / minerals / cordial / squash (not diet).....  | <input type="checkbox"/> 1 | <input type="checkbox"/> 2 | <input type="checkbox"/> 3 | <input type="checkbox"/> 4 |
| R. Soft drinks / minerals / cordial / squash (diet).....      | <input type="checkbox"/> 1 | <input type="checkbox"/> 2 | <input type="checkbox"/> 3 | <input type="checkbox"/> 4 |
| S. Full cream milk or full cream milk products.....           | <input type="checkbox"/> 1 | <input type="checkbox"/> 2 | <input type="checkbox"/> 3 | <input type="checkbox"/> 4 |
| T. Skimmed milk or skimmed milk products.....                 | <input type="checkbox"/> 1 | <input type="checkbox"/> 2 | <input type="checkbox"/> 3 | <input type="checkbox"/> 4 |

**Additional File 1 (b): Dietary Assessment tool Growing up in Ireland child main questionnaire**

**6. We would like you to think back to what you ate yesterday. Did you eat the following?**

|                                                                                  | No                         | One<br>Serving             | More than<br>one serving   |
|----------------------------------------------------------------------------------|----------------------------|----------------------------|----------------------------|
| a. Fresh fruit .....                                                             | <input type="checkbox"/> 1 | <input type="checkbox"/> 2 | <input type="checkbox"/> 3 |
| b. Cooked vegetables .....                                                       | <input type="checkbox"/> 1 | <input type="checkbox"/> 2 | <input type="checkbox"/> 3 |
| c. Meat pie, hamburger, hot dog,<br>sausage or sausage roll (any of these) ..... | <input type="checkbox"/> 1 | <input type="checkbox"/> 2 | <input type="checkbox"/> 3 |
| d. Chips or French fries .....                                                   | <input type="checkbox"/> 1 | <input type="checkbox"/> 2 | <input type="checkbox"/> 3 |
| e. Crisps or savoury snacks .....                                                | <input type="checkbox"/> 1 | <input type="checkbox"/> 2 | <input type="checkbox"/> 3 |
| f. Biscuits, doughnuts, cake, pie or<br>chocolate (any of these).....            | <input type="checkbox"/> 1 | <input type="checkbox"/> 2 | <input type="checkbox"/> 3 |
| g. Milk .....                                                                    | <input type="checkbox"/> 1 | <input type="checkbox"/> 2 | <input type="checkbox"/> 3 |
| h. Cheese or yoghurt.....                                                        | <input type="checkbox"/> 1 | <input type="checkbox"/> 2 | <input type="checkbox"/> 3 |
| i. Fizzy drinks or diet drinks.....                                              | <input type="checkbox"/> 1 | <input type="checkbox"/> 2 | <input type="checkbox"/> 3 |
| j. Bread, Pasta, Rice, Cereal (any of these).....                                | <input type="checkbox"/> 1 | <input type="checkbox"/> 2 | <input type="checkbox"/> 3 |
