# Supplementary material for: The use of a dietary quality score as a predictor of childhood overweight and obesity
Source: PubMed Central journal article supplement (PMC4477494; doi:10.1186/s12889-015-1907-y), 2015-06-24
Supplement: 12889_2015_1907_MOESM2_ESM.pdf [file 12889_2015_1907_MOESM2_ESM.pdf]

## Additional file 2: Prevalence odds ratios for overweight and obesity with Child DQS<sup>‡</sup> and potential confounders

<sup>‡</sup> derived from child's answers to 10-item FFQ of foods eaten yesterday in child main questionnaire. Model 1 unadjusted model, Model 2 Adjusted for gender and parent's education,

| N (%)                   |                                    | N (%)                      |                    |                                 |                  |                              |                  |                          |                  |
|-------------------------|------------------------------------|----------------------------|--------------------|---------------------------------|------------------|------------------------------|------------------|--------------------------|------------------|
|                         |                                    | Model 1<br>Unadjusted      |                    | Model 2<br>Demographics factors |                  | Model 3<br>Lifestyle factors |                  | Model 4<br>Parent factor |                  |
|                         |                                    | Overweight<br>1,565 (19.3) | Obese<br>531 (6.6) | Overweight                      | Obese            | Overweight                   | Obese            | Overweight               | Obese            |
|                         |                                    | OR (95 % CI)               |                    |                                 |                  |                              |                  |                          |                  |
| <b>DQS</b>              | <b>Q1 (Highest DQ)</b>             | 1.00                       | 1.00               | 1.00                            | 1.00             | 1.00                         | 1.00             | 1.00                     | 1.00             |
|                         | <b>Q2</b>                          | 1.09 (0.85 1.39)           | 1.00 (0.65 1.53)   | 1.07 (0.83 1.37)                | 0.95 (0.62 1.46) | 1.05 (0.82 1.35)             | 0.92 (0.60 1.41) | 1.08 (0.84 1.40)         | 0.99 (0.62 1.60) |
|                         | <b>Q3</b>                          | 1.03 (0.81 1.30)           | 1.09 (0.71 1.66)   | 0.99 (0.78 1.26)                | 0.99 (0.64 1.53) | 0.99 (0.77 1.26)             | 0.96 (0.61 1.49) | 1.00 (0.78 1.29)         | 1.06 (0.67 1.68) |
|                         | <b>Q4</b>                          | 1.02 (0.84 1.24)           | 1.50 (1.05 2.12)   | 0.98 (0.81 1.19)                | 1.32 (0.93 1.88) | 0.96 (0.79 1.16)             | 1.24 (0.87 1.77) | 0.93 (0.76 1.13)         | 1.24 (0.85 1.83) |
|                         | <b>Q5 (Lowest DQ)</b>              | 0.93 (0.75 1.14)           | 1.27 (0.87 1.84)   | 0.86 0.69 1.07                  | 1.03 (0.70 1.51) | 0.82 (0.66 1.02)             | 0.91 (0.62 1.36) | 0.79 (0.63 0.99)         | 0.88 (0.58 1.33) |
| <b>Gender</b>           |                                    |                            |                    |                                 |                  |                              |                  |                          |                  |
|                         | <b>Boys</b>                        |                            |                    | 1.00                            | 1.00             | 1.00                         | 1.00             | 1.00                     | 1.00             |
|                         | <b>Girls</b>                       |                            |                    | 1.47 (1.28 1.70)                | 1.56 (1.24 1.97) | 1.44 (1.25 1.67)             | 1.41 (1.11 1.78) | 1.44 (1.24 1.67)         | 1.39 (1.09 1.79) |
| <b>Parent education</b> |                                    |                            |                    |                                 |                  |                              |                  |                          |                  |
|                         | <b>Third level</b>                 |                            |                    | 1.00                            | 1.00             | 1.00                         | 1.00             | 1.00                     | 1.00             |
|                         | <b>Non-degree</b>                  |                            |                    | 1.21 (0.98 1.48)                | 1.89 (1.21 2.97) | 1.18 (0.96 1.45)             | 1.80 (1.14 2.83) | 1.16 (0.93 1.44)         | 2.10 (1.36 3.24) |
|                         | <b>Higher second level</b>         |                            |                    | 1.26 (1.03 1.53)                | 2.01 (1.33 3.03) | 1.21 (1.00 1.47)             | 1.83 (1.21 2.78) | 1.22 (0.99 1.49)         | 2.21 (1.52 3.22) |
|                         | <b>&lt;= Lower secondary level</b> |                            |                    | 1.47 (1.18 1.83)                | 3.31 (2.20 4.99) | 1.40 (1.12 1.75)             | 2.91 (1.93 4.37) | 1.30 (1.03 1.63)         | 2.97 (2.03 4.36) |
| <b>PA</b>               |                                    |                            |                    |                                 |                  |                              |                  |                          |                  |
|                         | <b>9 days or more</b>              |                            |                    |                                 |                  | 1.00                         | 1.00             | 1.00                     | 1.00             |
|                         | <b>6-8 days</b>                    |                            |                    |                                 |                  | 1.05 (0.88 1.25)             | 1.45 (1.08 1.95) | 1.05 (0.88 1.27)         | 1.47 (1.06 2.02) |
|                         | <b>3-5days</b>                     |                            |                    |                                 |                  | 1.39 (1.16 1.67)             | 2.26 (1.66 3.08) | 1.38 (1.14 1.66)         | 2.29 (1.67 3.14) |
|                         | <b>1-2 days</b>                    |                            |                    |                                 |                  | 1.08 (0.77 1.52)             | 2.56 (1.63 4.02) | 1.09 (0.76 1.55)         | 2.34 (1.42 3.84) |
|                         | <b>None</b>                        |                            |                    |                                 |                  | 1.19 (0.75 1.89)             | 4.37 (2.56 7.48) | 1.22 (0.76 1.95)         | 4.60 (2.62 8.09) |
| <b>TV</b>               |                                    |                            |                    |                                 |                  |                              |                  |                          |                  |
|                         | <b>Low</b>                         |                            |                    |                                 |                  | 1.00                         | 1.00             | 1.00                     | 1.00             |
|                         | <b>Moderate</b>                    |                            |                    |                                 |                  | 1.12 (0.93 1.34)             | 1.56 (1.11 2.18) | 1.05 (0.87 1.27)         | 1.38 (0.98 1.96) |
|                         | <b>High</b>                        |                            |                    |                                 |                  | 1.51 (1.16 1.97)             | 1.90 (1.21 2.98) | 1.42 (1.08 1.88)         | 1.78 (1.13 2.82) |
| <b>Parent BMI</b>       |                                    |                            |                    |                                 |                  |                              |                  |                          |                  |
|                         | <b>Normal</b>                      |                            |                    |                                 |                  |                              |                  | 1.00                     | 1.00             |
|                         | <b>Overweight</b>                  |                            |                    |                                 |                  |                              |                  | 1.77 (1.49 2.10)         | 3.53 (2.54 4.91) |
|                         | <b>Obese</b>                       |                            |                    |                                 |                  |                              |                  | 2.62 (2.15 3.20)         | 6.64 (4.70 9.37) |

Model 3 Adjusted model 2 and physical activity, and child's T.V. viewing time Model 4 adjusted for models 2 and 3 and parent's BMI
