# Supplementary material for: The use of a dietary quality score as a predictor of childhood overweight and obesity
Source: PubMed Central journal article supplement (PMC4477494; doi:10.1186/s12889-015-1907-y), 2015-06-24
Supplement: 12889_2015_1907_MOESM4_ESM.pdf [file 12889_2015_1907_MOESM4_ESM.pdf]

**Additional file 4: Prevalence odds ratios for overweight and obesity with frequency of consumption of individual food components of child reported DQS**

| OR (95 % CI)                 |              | Model 1 †        |                  | Model 2 ††       |                  |
|------------------------------|--------------|------------------|------------------|------------------|------------------|
|                              |              | Overweight       | Obese            | Overweight       | Obese            |
| Fresh fruit                  | Eaten once   | 1.01 (0.85 1.19) | 1.05 (0.81 1.36) | 1.03 (0.87 1.23) | 1.09 (0.82 1.44) |
|                              | Eaten > once | 0.91 (0.74 1.11) | 0.85 (0.61 1.17) | 0.95 (0.77 1.17) | 0.95 (0.68 1.34) |
| Cooked veg                   | Eaten once   | 0.96 (0.83 1.11) | 0.70 (0.55 0.90) | 1.01 (0.87 1.18) | 0.79 (0.61 1.03) |
|                              | Eaten > once | 0.86 (0.70 1.07) | 0.60 (0.56 1.13) | 0.92 (0.74 1.15) | 0.99 (0.68 1.45) |
| Bread, pasta, rice or cereal | Eaten once   | 1.00 (0.77 1.31) | 0.94 (0.64 1.40) | 1.03 (0.78 1.36) | 0.94 (0.61 1.45) |
|                              | Eaten > once | 1.07 (0.81 1.41) | 0.60 (0.40 0.91) | 1.15 (0.86 1.53) | 0.65 (0.41 1.03) |
| Milk                         | Eaten once   | 1.00 (0.81 1.23) | 0.83 (0.63 1.11) | 1.11 (0.89 1.38) | 0.91 (0.67 1.23) |
|                              | Eaten > once | 0.95 (0.77 1.16) | 0.59 (0.42 0.82) | 1.10 (0.88 1.37) | 0.67 (0.47 0.95) |
| Cheese/ yoghurt              | Eaten once   | 1.07 (0.92 1.25) | 1.22 (0.95 1.57) | 1.15 (0.97 1.35) | 1.33 (1.03 1.73) |
|                              | Eaten > once | 1.13 (0.91 1.41) | 1.14 (0.76 1.70) | 1.18 (0.94 1.49) | 1.27 (0.83 1.95) |
| Meat pie sausage             | Eaten once   | 0.98 (0.84 1.15) | 1.14 (0.89 1.45) | 0.96 (0.81 1.13) | 0.96 (0.74 1.26) |
|                              | Eaten > once | 1.17 (0.81 1.67) | 0.65 (0.29 1.46) | 1.16 (0.79 1.70) | 0.66 (0.29 1.46) |
| Chips or French fries        | Eaten once   | 0.93 (0.80 1.09) | 1.42 (1.12 1.80) | 0.87 (0.74 1.03) | 1.20 (0.93 1.54) |
|                              | Eaten > once | 0.92 (0.57 1.48) | 0.50 (0.20 1.25) | 0.91 (0.55 1.52) | 0.47 (0.19 1.17) |
| Crisps/ savoury snacks       | Eaten once   | 0.88 (0.76 1.02) | 1.06 (0.83 1.35) | 0.86 (0.73 1.00) | 1.04 (0.80 1.34) |
|                              | Eaten > once | 0.78 (0.59 1.01) | 0.64 (0.40 1.03) | 0.72 (0.55 0.95) | 0.54 (0.33 0.89) |
| Biscuits/ chocolate          | Eaten once   | 0.87 (0.74 1.02) | 0.62 (0.48 0.81) | 0.87 (0.74 1.04) | 0.62 (0.47 0.83) |
|                              | Eaten > once | 0.72 (0.57 0.90) | 0.55 (0.39 0.80) | 0.71 (0.56 0.90) | 0.52 (0.35 0.78) |
| Fizzy drinks                 | Eaten once   | 0.97 (0.83 1.13) | 1.40 (1.09 1.80) | 0.87 (0.74 1.03) | 1.08 (0.83 1.41) |
|                              | Eaten > once | 0.94 (0.72 1.19) | 1.24 (0.83 1.87) | 0.86 (0.67 1.10) | 0.91 (0.59 1.42) |

Reference category: not eaten over the past 24 hours. †Unadjusted regression †† Adjusted for child's gender, PA level and T.V. viewing and the parent's education and BMI.
